RESEARCH ARTICLE

# Management of the soybean cyst nematode *Heterodera glycines* with combinations of different rhizobacterial strains on soybean

Yuanyuan Zhou<sup>1</sup>, Yuanyuan Wang<sup>1</sup>, Xiaofeng Zhu<sup>1</sup>, Rui Liu<sup>1</sup>, Peng Xiang<sup>2</sup>, Jingsheng Chen<sup>1,3</sup>, Xiaoyu Liu<sup>1</sup>, Yuxi Duan<sup>1\*</sup>, Lijie Chen<sup>1\*</sup>

**1** Nematology Institute of Northern China, Shenyang Agricultural University, Shenyang, Liaoning, China, **2** Heihe Branch, Heilongjiang Academy of Agricultural Sciences, Heihe, Heilongjiang, China, **3** Daqing Branch, Heilongjiang Academy of Agricultural Sciences, Daqing, Heilongjiang, China

\* [chenlj-0210@syau.edu.cn](mailto:chenlj-0210@syau.edu.cn) (LJC); [duanyx6407@163.com](mailto:duanyx6407@163.com) (YXD)

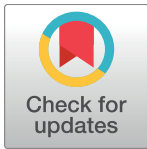

**OPEN ACCESS**

**Citation:** Zhou Y, Wang Y, Zhu X, Liu R, Xiang P, Chen J, et al. (2017) Management of the soybean cyst nematode *Heterodera glycines* with combinations of different rhizobacterial strains on soybean. PLoS ONE 12(8): e0182654. <https://doi.org/10.1371/journal.pone.0182654>

**Editor:** Wei Wang, Henan Agricultural University, CHINA

**Received:** May 3, 2017

**Accepted:** July 22, 2017

**Published:** August 3, 2017

**Copyright:** © 2017 Zhou et al. This is an open access article distributed under the terms of the [Creative Commons Attribution License](https://creativecommons.org/licenses/by/4.0/), which permits unrestricted use, distribution, and reproduction in any medium, provided the original author and source are credited.

**Data Availability Statement:** All relevant data are within the paper and its Supporting Information files.

**Funding:** This work was supported by the Special Fund for Agro-scientific Research in the Public Interest (201503114), National Natural Science Foundation of China (31471748), and China Agriculture Research System CARS-04-PS13. The funders had no role in study design, data collection and analysis, decision to publish, or preparation of the manuscript.

## Abstract

Soybean cyst nematode (SCN) is the most damaging soybean pest worldwide. To improve soybean resistance to SCN, we employed a soybean seed-coating strategy through combination of three rhizobacterial strains, including *Bacillus simple*, *B. megaterium* and *Sinorhizobium fredii* at various ratios. We found seed coating by such rhizobacterial strains at a ratio of 3:1:1 (thereafter called SN101) produced the highest germination rate and the mortality of J2 of nematodes. Then, the role of soybean seed coating by SN101 in nematode control was evaluated under both greenhouse and two field conditions in Northeast China in 2013 and 2014. Our results showed that SN101 treatment greatly reduced SCN reproduction and significantly promoted plant growth and yield production in both greenhouse and field trials, suggesting that SN101 is a promising seed-coating agent that may be used as an alternative bio-nematicide for controlling SCN in soybean fields. Our findings also demonstrate that combination of multiple rhizobacterial strains needs to be considered in the seed coating for better management of plant nematodes.

## Introduction

The soybean cyst nematode (SCN *Heterodera glycines*) is one of the most economically important pest on soybean (*Glycine max*) worldwide. Average yield loss of soybean due to SCN infection is up to 30% in China, even up to 70% in some fields of Northeast China[1]. SCN is also continuous yield limitation in USA [2–4]. Infection of SCN leads to formation of a syncytial feeding site in soybean, which functions as metabolic sinks to nourish the nematodes [5]. As a result of nematode infection, the nodulation and nitrogen fixation is suppressed in soybean, thereby resulting in plant nutrient deficiency symptoms [6].

Various practices including crop rotation, resistance cultivars and nematicide application have been used to control SCN. However, SCN-resistant varieties have been limited in practice by long term breeding [7], various photoperiods in different areas and genetic diversity of SCN races in the fields [8]. Further, many nematicides have already been removed from the

**Competing interests:** The authors have declared that no competing interests exist.

market because of their negative effects on public and environmental health [9]. However, seed coating approach, which can minimize pesticide dust-off [10], is effective to control plant pests and diseases [11]. Seed coating on soybean using insecticide chitosan improves seed germination rate, root establishment and yields [12,13]. Therefore, developing alternative safe and efficient way such as seed coating is urgent for SCN control.

Bacteria are the most important biocontrol agents. Individual rhizosphere and/or endophytic bacteria, such as *Rhizobium* spp., *Bacillus firmus* strain GB126 and *B. subtilis* could display biological activity against nematodes [14–18]. Co-application of *Paecilomyces lilacinus* and *B. firmus* provides effective control of root-knot nematodes in the pot experiment [19]. In contrast, it is not clear whether the combination of several beneficial bacteria plays a synergistic effect to control SCN in the greenhouse or in the field, although there are potential of synergic effect.

Our previous studies showed that individuals of three strains, namely *Sinarhizobium fredii* strain Sneb183 [20], *B. megaterium* strain Sneb 482 [21] and *B. simplex* strain Sneb545 [22], reduced the activity of SCN in the lab condition. This study was aimed to evaluate the effect of mixture of the three bacterial strains as a seed-coat treatment of soybean on SCN control and soybean yield under greenhouse and field conditions.

## Materials and methods

### Nematode inoculum

For the greenhouse experiment, SCN race 1 was used. They were collected from the naturally infested soil in Kangping County in Liaoning Province and identified using the method described by Riggs [23]. SCN second-stage juveniles (J2) were obtained by first collecting cysts on a set of sieves of 420  $\mu\text{m}$  and 250  $\mu\text{m}$ , surface-disinfecting with 0.5% NaOCl for 3 min, and washing three times with sterile water before placing in an incubator at 28°C to allow the J2 to hatch. The nematode inoculum was used for pot experiments. For the field experiment, soybean cyst nematode race 1 and 3 as identified previously [23] were naturally infested in the field of Kangping and Daqing, respectively.

### Preparation of bacterial strains and biocontrol agents

*S. fredii* strain Sneb183, used in this study was originally isolated from the rhizosphere of pines in Liaoning province, China [20]. *B. megaterium* strain Sneb482 was isolated from soybean root nodule and *B. simplex* strain Sneb545 from the soil around rhizosphere of soybean in Liaoning province, China [22]. Sneb183 was grown on yeast morphology agar (YMA) medium, Sneb482 and Sneb545 on beef extract peptone (NA) medium respectively, for 48h at 28°C in the dark. A single colony was selected and inoculated in 100 mL tryptone yeast (TY) for Sneb183 or NA liquid medium for Sneb482 and Sneb545 in a flask, which was then incubated for 48 h at 28°C on a rotary shaker at 150 rpm. Then the bacteria density was adjusted to a final optical density (OD) of 2 at 560 nm for Sneb183, 0.3 at 580nm for Sneb545 and 0.25 for Sneb482, containing approximately  $1.0 \times 10^9$  CFU  $\text{ml}^{-1}$ , with the growth liquid medium and stored at 4°C for use.

### Plant material and soil

In germination and greenhouse experiments, the soybean cultivars Liaodou15 (provided by the Liaoning Academy of Agricultural Sciences) and Hefeng50 (provided by the Heilongjiang Academy of Agricultural Sciences) were used, which are susceptible to SCN. The seeds were surface-sterilized with 75% ethanol for 1 min, followed by 1.5% NaOCl for 3 min, and then rinsed with sterile water multiple times and air-dried. The sterilized seeds were then coated

with different hundred biocontrol agents at a ratio of seed weight to bacteria suspension mixture volume at 1:70 and air-dried. Field experiments were conducted in two locations for 2 years from 2013 to 2014. Liaodou15 was used in the field of Kangping County, Liaoning Province and Hefeng50 in Daqing city, Heilongjiang Province.

For the pot experiment in the greenhouse, soil material bought from Shenyang Jintian Horticulture Research Institute were autoclaved at 137.9 kPa for 20 min. Then 500 g of mixed soil was put into 11-cm-diam plastic pot. In the field, the native soil contained organic substrate 9.20 (g/kg) in Kangping and 5.39 (g/kg) in Daqing. And the available nitrogen, phosphorus and potassium (mg/kg) in the two fields were 116.14, 9.79, and 111.11 in Kangping and 44.76, 17.51 and 94.75 in Daqing, respectively.

### In vitro Effect of the three bacteria and the combination on nematode mortality

Nematicidal effect of *S. fredii*, *B. megaterium* and *B. simplex* was evaluated against SCN under laboratory conditions. One hundred of SCN juveniles were transferred to the suspensions of microorganisms ( $10^9$  CFU ml<sup>-1</sup> of *S. fredii*,  $10^9$  CFU ml<sup>-1</sup> of *B. megaterium* and  $10^9$  CFU ml<sup>-1</sup> of *B. simplex*) separately or combined in different proportions in sterilized Petri dishes, and separated sets of Petri dishes were maintained for 48h for observation. Five replicates were conducted for each treatment. Then, mortality of nematodes was assessed and confirmed by touching the juvenile with fine needle. Five treatments (SN101 1–5) were used for the assay. SN101-1 contained *B. simplex*, *B. megaterium* and *S. fredii* with 3:1:1, and SN101-2 contained them with 1:1:1, SN101-3 contained only *B. simplex*, and SN101-4 contained only *B. megaterium*, SN101-5 contained only *S. fredii* and sterilized distilled water treatment was used as blank control. Five replicates were conducted for each treatment and the experiment was repeated.

### Effect of different bioagents on the seedling growth of soybean

In order to select the best ratio of bacterial mixture for seed-coating, an initial germination test was conducted. Early experiment proved increase of germination when different strains were applied together. Seeds were sterilized as described above. The sterilized seeds were then coated with SN101-1, SN101-2, SN101-3, SN101-4 and sterile water, then air-dried again. The coated seeds were placed on wet blotters and germination test was conducted by using the filter paper method [24]. They were incubated at  $28 \pm 1^\circ\text{C}$  for one week. The filter papers were moistened with sterile water as needed and the seeds germination was recorded daily. Seedling vigor was determined by its vigor index (VI), using the following formula described by Baki and Anderson [25] for calculation.

Vigor index (VI) = (mean shoot length+mean root length) × percentage of germination

The optimal ratio of the bacterial mixture treatment was determined based on the seedling vigor value, and referred as SN101.

### Effect of SN101 bioagent on SCN infection under greenhouse condition

To further verify the effect of SN101, a commercial seed coating agent (BFA) was selected, and a pot experiment under greenhouse was designed. Soil and seeds were treated as described above. Seedlings of soybean (Liaodou 15) were raised in 11-cm-diam plastic pots each containing 500g sterilized soil. The SN101-coated soybean seeds were sown in these pots and maintained at  $27 \pm 3^\circ\text{C}$  under a 16 h/8 h light/dark cycle. Uncoated seeds were sown as a control (denoted as CK), and seeds coated with a commercial biological seed coating agent, named BFA which contained 40% of bio-control bacteria (Manufacturer: Zhong Cai Sheng Shi biotechnology development co., Inner Mongolia MoQi branch) were sown as a bio-nematicide

control. There are ten pots per line, and one seed in a pot, five lines were conducted for each treatment.

The soybean seedlings were inoculated with 3000 second-stage juveniles (J2) per plant at their two-leave stages. The juveniles were dispensed in 8 ml of water and distributed evenly into the soil around the seedling. Pots were arranged in randomized block design on a bench in the greenhouse at  $25\pm 2^{\circ}\text{C}$ . The plants were taken out from the pots 30 days after inoculation, washed and blotted dry. The measured data included plant height, root length, cysts/100  $\text{cm}^3$  mixed soil. The soybean roots were stained with 0.1% acid fuchsin [26,27] and the SCN juveniles from J2 to J4 stages inside the roots were counted. Six replicates were conducted for each treatment and the experiment was repeated.

### Effect of SN101 bioagent on SCN infection under field conditions

Field trials were conducted in the soybean fields naturally infested by SCN at Kangping County in Liaoning Province and Daqing city in Heilongjiang Province in 2013 and 2014. In 2013, the seeding date was May 12 and May 20, and harvested in the Oct. 17 and Oct. 10 in Kangping and Daqing, respectively. In 2014, the seeding and harvesting date was May 8 and Oct. 8, separately, in Kangping and May 18 and Sep. 30 in Daqing. As the greenhouse trial, the optimized seed coating formula SN101 was used for evaluation. Also, uncoated seeds (denoted as CK) and seeds coated with BFA (a commercially bio-nematicide) were sown as two controls. Each experimental unit consisted of a five-row plot (5×5m) planted with 100 soybean seeds per row. For each treatment there are five unions. The field trials were arranged as a randomized complete block design with five replicates for each treatment each year.

Twenty-five soybean seedlings were randomly selected from each replicate (using Z-shaped method) after 30–35 days seeding, respectively. The following data were recorded: plant height, root length, above-ground and under-ground fresh weight (data not shown), the number of cysts on the roots and in the soil around the roots, the number of eggs per cyst, and the number of SCN juveniles (J2, J3, J4) inside the roots. The roots were carefully removed from soil and cysts were counted directly, and then the plants were carefully taken back to laboratory. The fresh weight of the root and shoot for each plant was weighed by electronic analytical balance immediately, then the height of the shoot and root was measured by a plastic ruler. Nematodes inside the roots were stained as described previously [26] and the different stages were determined and counted under the microscope. For soybean yield estimation, twenty-five soybean plants were randomly collected as above and surveyed in each unit at harvest. The plant heights, pod numbers per plant, seed numbers per plant, and 100-seed weight were measured. The field tests were repeated 2 years from 2013 to 2014, and the average number was calculated to evaluate the effect of SN101 on SCN control.

We also conducted the field experiments in scientific experimental stations of Heihe and Jiusan for from 2012 to 2016 and measured the plant yield at harvest. In Heihe station, the soybean cultivar Heihe43 was used, and in Jiusan station the cultivar Kenjiandou28 was used. There are only one plot with the area of 416  $\text{m}^2$  for each treatment each year.

### Statistical analysis

The growth indices of soybean growth, soybean yield, cyst number, egg number per cyst, and juvenile number per root were used in statistical analysis. Analysis of variance (ANOVA) was used individually for each field experiment, and the significance of differences among the treatments was determined according to Least Significant Difference (LSD) ( $P \leq 0.05$ ). To analyze the effect of SN101 seed coating on SCN infection, soybean growth and soybean yield under field condition, a multiple-factor ANOVA was performed. The factors included years

**Table 1. Effect of five SN101 biocontrol agents on mortality of second-stage juveniles of *Heterodera glycines*.**

| Treatments                       | Mortality rate (%) |            |
|----------------------------------|--------------------|------------|
|                                  | After 24 h         | After 48 h |
| SN101-1                          | 91.2±1.5a          | 97±0.84a   |
| SN101-2                          | 83.4±1.33b         | 91.6±0.87b |
| SN101-3 ( <i>B. simple</i> )     | 81.2±1.77bc        | 90.6±1.36b |
| SN101-4 ( <i>B. megaterium</i> ) | 84±0.55b           | 89.4±1.36b |
| SN101-5 ( <i>S. fredii</i> )     | 77.4±2.29c         | 84.2±1.43c |
| Control                          | 4±1.22d            | 6±0.71d    |

<https://doi.org/10.1371/journal.pone.0182654.t001>

(two levels), sites (two levels) and treatment (three levels). When an overall ANOVA indicated significant effects of the factors or their interactions, the means were compared. Data were analyzed using the software SPSS 17.0.

## Results

### In vitro assay

The mortality of SCN J2 was significantly increased in all treatments compared to the blank control at 12h and 48 h. The combination treatment SN101-1 resulted in highest mortality rate at 24 h (91%) and 48 h (up to 97%). The mortality rates with other four SN101 treatments could reach 77–84% at 24 h and 84–92% at 48 h, only 4–6% for control treatment (Table 1).

Mortality was determined by checking mortality after 24h and 48h. The data in the table are mean ± SE and means on the same column followed by different letters indicate significant differences based on a LSD test ( $P \leq 0.05$ ,  $n = 100$ ). SN101-1 contained *B. simple*, *B. megaterium* and *S. fredii* with 3:1:1, and SN101-2 contained them with 1:1:1, the concentration of each strain was  $1 \times 10^9$  cfu/ml, SN101-3 contained only  $1 \times 10^9$  cfu/ml of *B. simple*, and SN101-4 contained only  $1 \times 10^9$  cfu/ml of *B. megaterium*, SN101-5 contained only *S. fredii* and sterilized distilled water treatment used as blank control.

### Effect of SN101 bioagents on soybean seed germination and seedling vigor

All seed coating agents increased the percentage of seed germination and there are no significant difference among them (Table 2). The highest VI was recorded in seeds coated with SN101-1 and SN101-4. Moreover, SN101-1 seed coating has the most beneficial effect on the

**Table 2. Effect of biocontrol agents on soybean seed germination and seedling vigor ( $P \leq 0.05$ ).**

| Treatments                       | Germination (%) | Mean Shoot Length (cm) | Mean Root Length (cm) | Vigor index(VI) |
|----------------------------------|-----------------|------------------------|-----------------------|-----------------|
| SN101-1                          | 94.33±1.2a      | 6.49±0.19a             | 11.69±0.32a           | 1714.92±42.68a  |
| SN101-2                          | 94±3.05a        | 5.28±0.15bc            | 9.25±0.32b            | 1365.82±38.82b  |
| SN101-3 ( <i>B. simple</i> )     | 94.67±1.76a     | 5.18±0.13c             | 9.50±0.31b            | 1389.76±34.71b  |
| SN101-4 ( <i>B. megaterium</i> ) | 94.67±2.73a     | 6.11±0.22ab            | 10.96±0.38a           | 1616.02±49.14a  |
| Uncoated                         | 87±1.0b         | 6.06±0.54ab            | 9.44±0.35b            | 1348.5±61.91b   |

The data in the table are mean ± SE and means on the same column followed by different letters indicate significant differences based on a LSD test ( $P \leq 0.05$ ,  $n = 200$ ). SN101-1 contained *B. simple*, *B. megaterium* and *Sinarhizobium fredii* with 3:1:1, and SN101-2 contained them with 1:1:1, the concentration of each strain was  $1 \times 10^9$  cfu/ml, SN101-3 contained only  $1 \times 10^9$  cfu/ml of *B. simple*, and SN101-4 contained only  $1 \times 10^9$  cfu/ml of *B. megaterium*, sterile water treatment used as blank control for seed coating.

<https://doi.org/10.1371/journal.pone.0182654.t002>

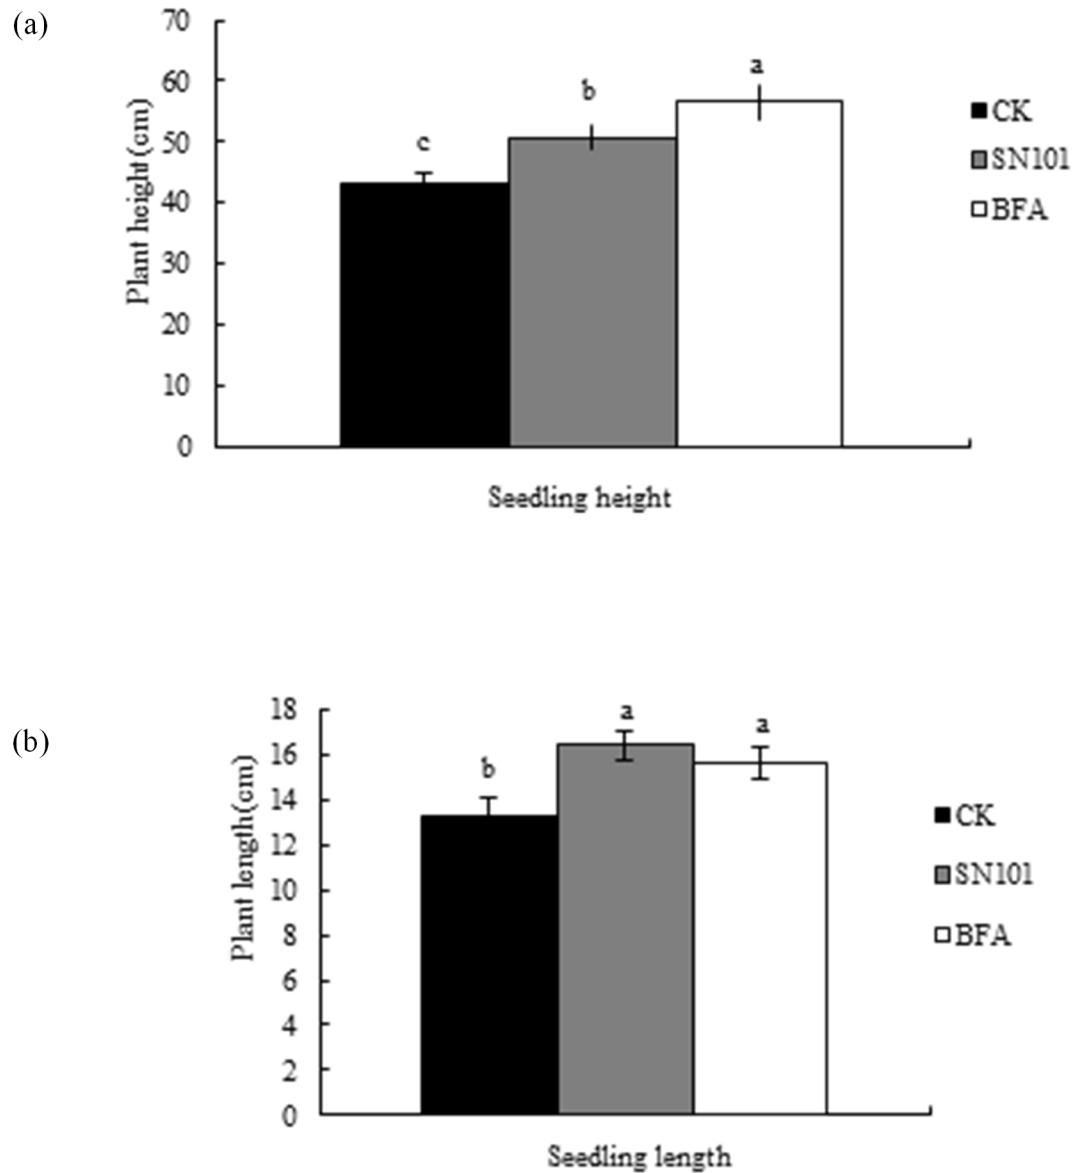

**Fig 1. Effects of SN101 seed coating on the control of SCN infestation in soybean under greenhouse condition.** Plants were treated with biocontrol seed coating-SN101, chemical seed coating-BFA and uncoated-CK. The number of juveniles and cysts was measured after nematode inoculation 30 days. The data in the figure are mean  $\pm$  SE and means on the same column followed by different letters indicate significant differences based on a LSD test ( $P \leq 0.05$ ,  $n = 12$ ).

<https://doi.org/10.1371/journal.pone.0182654.g001>

shoot length and root length when compared to other treatments and control ( $P \leq 0.05$ ). Therefore, SN101-1 seed coating (thereafter called SN101) was used in the following greenhouse and field experiments.

### Effect of SN101 on SCN population and soybean growth under greenhouse conditions

At 30 days post inoculation, cyst numbers in the soil per pot (Fig 1A) and SCN juveniles inside the roots were reduced by 18.13% and 26.72% ( $P \leq 0.05$ ), respectively, after seeds were treated

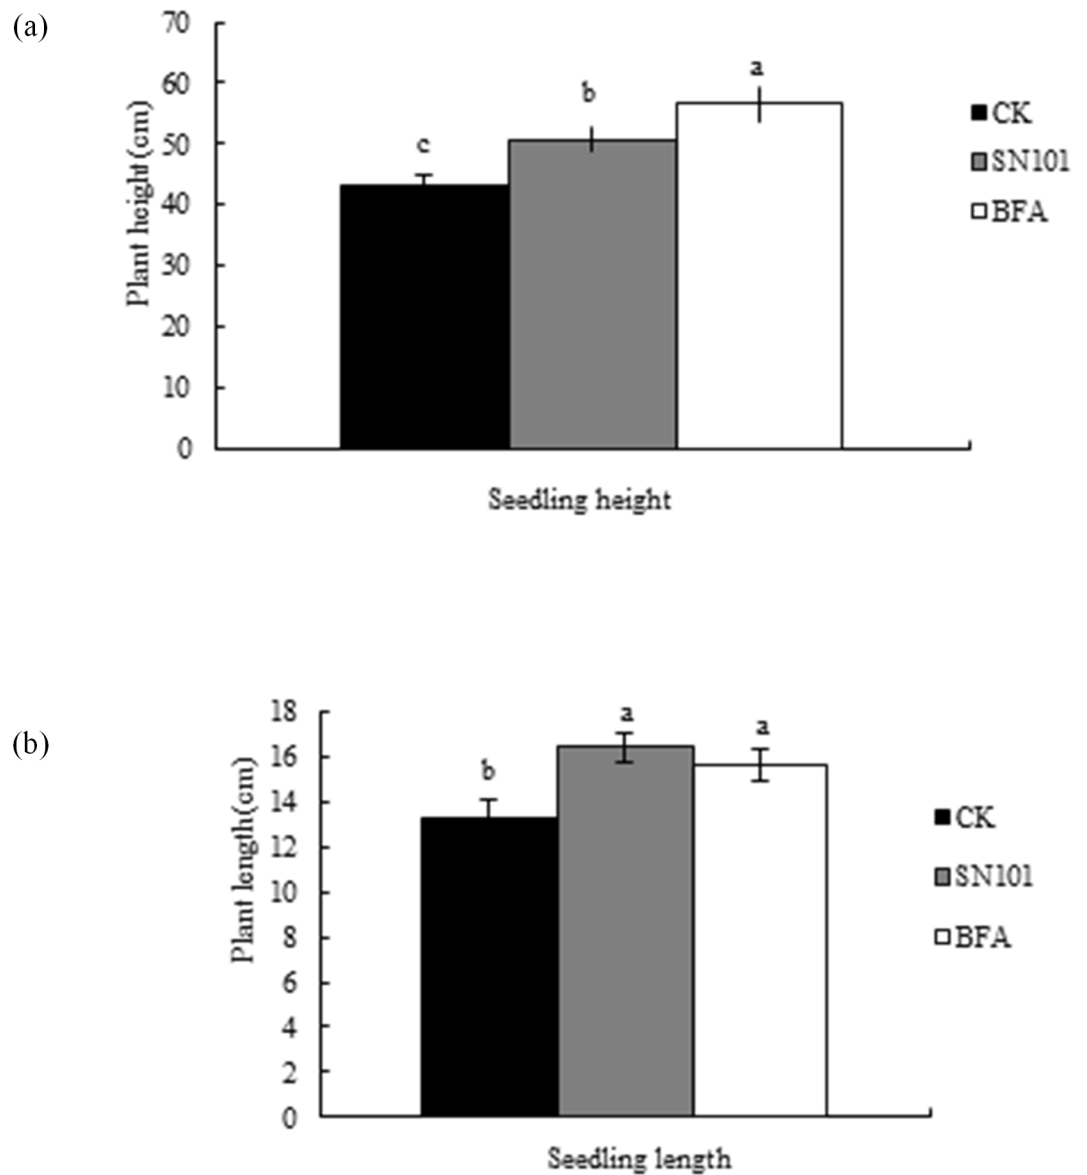

**Fig 2. Effects of SN101 seed coating on soybean height and root length under greenhouse condition.** Plants were treated with biocontrol seed coating-sn101, chemical seed coating-BFA and uncoated-CK. The plant height and root length was measured after nematode inoculation 30 days. The data in the figure are mean  $\pm$  SE and means on the same column followed by different letters indicate significant differences based on a LSD test ( $P \leq 0.05$ ,  $n = 125$ ).

<https://doi.org/10.1371/journal.pone.0182654.g002>

with SN101, and reduced by 6.79% and 23.64% ( $P \leq 0.05$ ) in BFA treatment, when compared to uncoated ones. Meanwhile, the seedling height and root length of the soybean plants were increased by 17.12% and 43.55% ( $P \leq 0.05$ ), respectively, after treatment with SN101, compared to the uncoated control (Fig 2).

### Application of SN101 seed coating for nematode control under field conditions

Multiple factor ANOVA analysis indicated that years, sites and treatments had a significant effect on the nematode dynamics except for the effect of sites on the number of eggs per cyst.

**Table 3. Analysis of variance of three factors (years, sites and treatments).**

| Index                                         | Y (Year) | S (Sites) | T (Treatments) | Y*S     | Y*T     | S*T    | Y*S*T  |
|-----------------------------------------------|----------|-----------|----------------|---------|---------|--------|--------|
| The number of cysts per root system           | 6.97*    | 769.31*   | 73.16*         | 48.89*  | 15.42*  | 8.70*  | 48.41* |
| The number of cysts per 100g rhizosphere soil | 4.2*     | 9.74*     | 38.58*         | 16.96*  | 2.249ns | 1.41ns | 0.28ns |
| The number of juveniles per gram of root      | 168.67*  | 62.32*    | 8.14*          | 8.30*   | 0.07ns  | 1.65ns | 0.03ns |
| The number of eggs per cyst                   | 13.13*   | 2.52ns    | 73.35*         | 2.29ns  | 2.70ns  | 4.08*  | 0.10ns |
| Seedling plant height                         | 859.49*  | 64.99*    | 0.82ns         | 59.07*  | 3.59*   | 5.92*  | 0.61ns |
| Mature plant height                           | 164.76*  | 1340.01*  | 74.82*         | 76.49*  | 9.07*   | 1.52ns | 5.35*  |
| Seedling root length                          | 496.53*  | 0.002ns   | 4.27*          | 0.22ns  | 3.06*   | 0.43ns | 0.89ns |
| Pods number per plant                         | 56.40*   | 132.52*   | 38.04*         | 201.29* | 6.18*   | 4.21*  | 11.44* |
| Seeds number per plant                        | 13.86*   | 6.77*     | 25.03*         | 233.57* | 2.70ns  | 2.07ns | 1.48ns |
| 100-seed weight (g)                           | 244.51*  | 807.71*   | 3.85*          | 15.13*  | 0.42ns  | 0.90   | 1.2    |

ns, non-significant at  $P \leq 0.05$  level

\*  $P \leq 0.05$  levels. Y, year; S, sites; T, treatments; Y\*S, year and sites interaction; Y\*T, year and treatments interaction; S\*T, sites and treatments; Y\*S\*T, year and sites and treatments interaction.

<https://doi.org/10.1371/journal.pone.0182654.t003>

But there are limited interactions among the factors: years, sites, and treatments, except for the effect of significant interactions on the number of cysts per root system (Table 3).

We found that the cyst number per root system (Fig 3A) were significantly reduced by 36.61% and 55.52% at Kangping in 2013 and 2014, and significantly reduced by 60.7% at Daqing in 2013 after SN101 treatment ( $P \leq 0.05$ ), respectively, when compared to the control. We also found the cysts per 100 cm<sup>3</sup> of soil (Fig 3B) were significantly reduced by 19.62% and 12.97%, respectively, after SN101 treatment when compared to the control ( $P \leq 0.05$ ) at Kangping in 2013 and 2014, and reduced 37.4% and 21.89%, respectively, at Daqing in 2013 and 2014. After BFA treatment, the cysts per 100 cm<sup>3</sup> of soil were significantly reduced by 35.53% and 14.77% when compared to the control ( $P \leq 0.05$ ) at Kangping in 2013 and 2014, and reduced by 28.78% and 16.51% at Daqing in 2013 and 2014 (Fig 3B). However, there were no significant difference in the cyst numbers among SN101, BFA treatment and control ( $P \leq 0.05$ ) at Daqing in 2014. Moreover, the number of juveniles inside the soybean roots was reduced by 61.8% and 53.51% at Kangping, and reduced by 50.65% and 85.95% at Daqing after SN101 treatment when compared to the uncoated control from 2013 to 2014 (Fig 3C). Furthermore, the egg number per cyst was significantly inhibited after SN101 seed coating or BFA seed coating when compared with the uncoated control (Fig 3D).

Multiple factor ANOVA analysis showed that years, sites and treatments had a significant effect on the soybean growth except for the effect of sites on the seedling root length and the effect of treatments on seedling plant height. There are limited interactions among the factors: years, sites, and treatments except for significant interactions between years and treatments (Table 3). Although no significant differences were observed in soybean plant height at seedling stage between treatments (Fig 4A), the mature heights were significantly increased after SN101 treatment ( $P \leq 0.05$ ) when compared to the uncoated control (Fig 4B) except for BFA treatment at Daqing in 2014. On the other hand, we found that the soybean root length at seedling stage was not significant different among these treatments except at Kangping in 2014.

Multiple factor ANOVA analysis suggested that years, sites and treatments had a significant effect on the soybean yield. But there are limited interactions among the factors: years, sites, and treatments except for significant interactions between years and sites (Table 3). The soybean yield was significantly increased by 30.09% and 51.08% ( $P \leq 0.05$ ), respectively, when



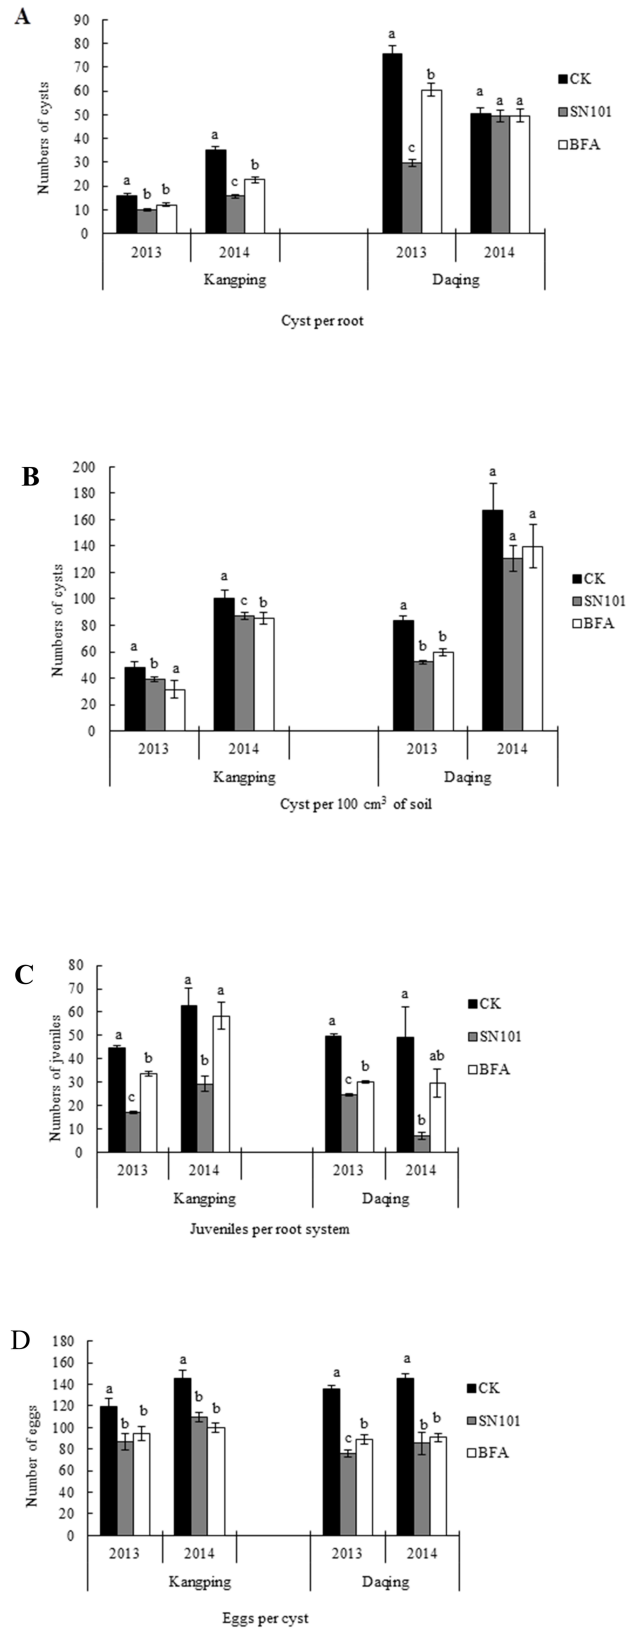

**Fig 3. SN101 seed coating inhibited SCN infection under soybean filed conditions in 2013 and 2014.** Plants were treated with biocontrol seed coating-SN101, chemical seed coating-BFA and uncoated-CK. The

number of juveniles in roots, cysts in soil and in roots, and eggs per cyst was measured after planted 30–35 days. The data in the figure are mean  $\pm$  SE and means on the same column followed by different letters indicate significant differences based on a LSD test ( $P \leq 0.05$ ). **A.** the number of cysts per root system ( $n = 125$ ), **B.** the number of cysts per 100 g of rhizosphere soil ( $n = 25$ ), **C.** the number of juveniles per gram of root ( $n = 125$ ), **D.** the number of eggs per cyst ( $n = 25$ ).

<https://doi.org/10.1371/journal.pone.0182654.g003>

applying SN101 seed coating, and increased by 11.15% and 24.63%, respectively, in BFA treatment, when compared to untreated control in the fields of Kangping and Daqing (Table 4). The soybean yield enhancement was due to the significantly increased number of available pods and seeds per plant after SN101 seed coating and BFA treatment compared to untreated control, but the increase rate was significant higher for the SN101 seed coating. There are no significant difference in the weight of 100 seeds in SN101 and BFA treatment compared to untreated control.

Plants were treated with biocontrol seed coating-SN101, chemical seed coating-BFA and uncoated-CK. The data in the table are mean  $\pm$  SE and means on the same column followed by different letters indicate significant differences based on a LSD test ( $P \leq 0.05$ ,  $n = 125$ ).

To further validation the effect of SN101 seed coating on soybean production, the final yields of soybeans were measured from 2012 to 2016. The results showed that soybean yields in the two stations were increased by 9.99–25.38% in Heihe Station and by 7.5–16.63% in Jiusan Station, respectively after SN101 seed coating treatment (Table 5).

## Discussion

We, for the first time, examined the effect of co-applying three rhizobacterial strains on nematode control under greenhouse and field conditions in China. Our results suggest that SN101 is a promising biocontrol agent for managing SCN. The role of SN101 in biological control of nematodes is very stable in the two field sites (Kangping and Daqing) for two years, and two stations (Heihe and Jiusan) for five years indicating it can be widely used in the fields. Compared to multiple applications of chemical nematicides in one growth season, one application of seed-coating SN101 will reduce dosage of chemical nematicide application, which considerably reduces the environmental pollution.

The combination of the three SN101 strains could inhibit SCN reproduction. Previous studies showed that combination of *Monacrosporium lysipagum* and *Paecilomyces lilacinus* reduced population of *Radopholus similis*, *Heterodera avenae* and *Meloidogyne javanica* in banana, barley plant and tomato, respectively [28], indicating that combination of various biocontrol agents provides enhanced control effect over a single agent. Taking the nematode lethality rate and soybean yield increase rate into consideration, the current study has provided evidence that *B. simple*, *B. megaterium* and *S. fredii* applied in 3:1:1 ratio is suitable for controlling nematodes on soybean under natural field conditions. The three strains did not show any antagonism among them. Previous study showed that each of *B. simple*, *B. megaterium* and *S. fredii* for nematode control efficacy (Cyst number per root) respectively reached 47.92%, 41.8% and 46.2% in the field conditions in Daqing, Anda and Kangping in 2011 (S1 Table). Our result suggested that combination of these three biocontrol strains provides enhanced stably control effect over a single strain. Most rhizobacteria reduced nematode populations by metabolic products, such as toxins and enzymes [29]. However, how SN101 mechanisms as the effective biological control agent remains are unknown in here. There may be synergistic effect among three bacteria strains, which enhances the effect of nematode control. So in the next step, we are exploring the biochemistry and molecular mechanisms of SN101 in

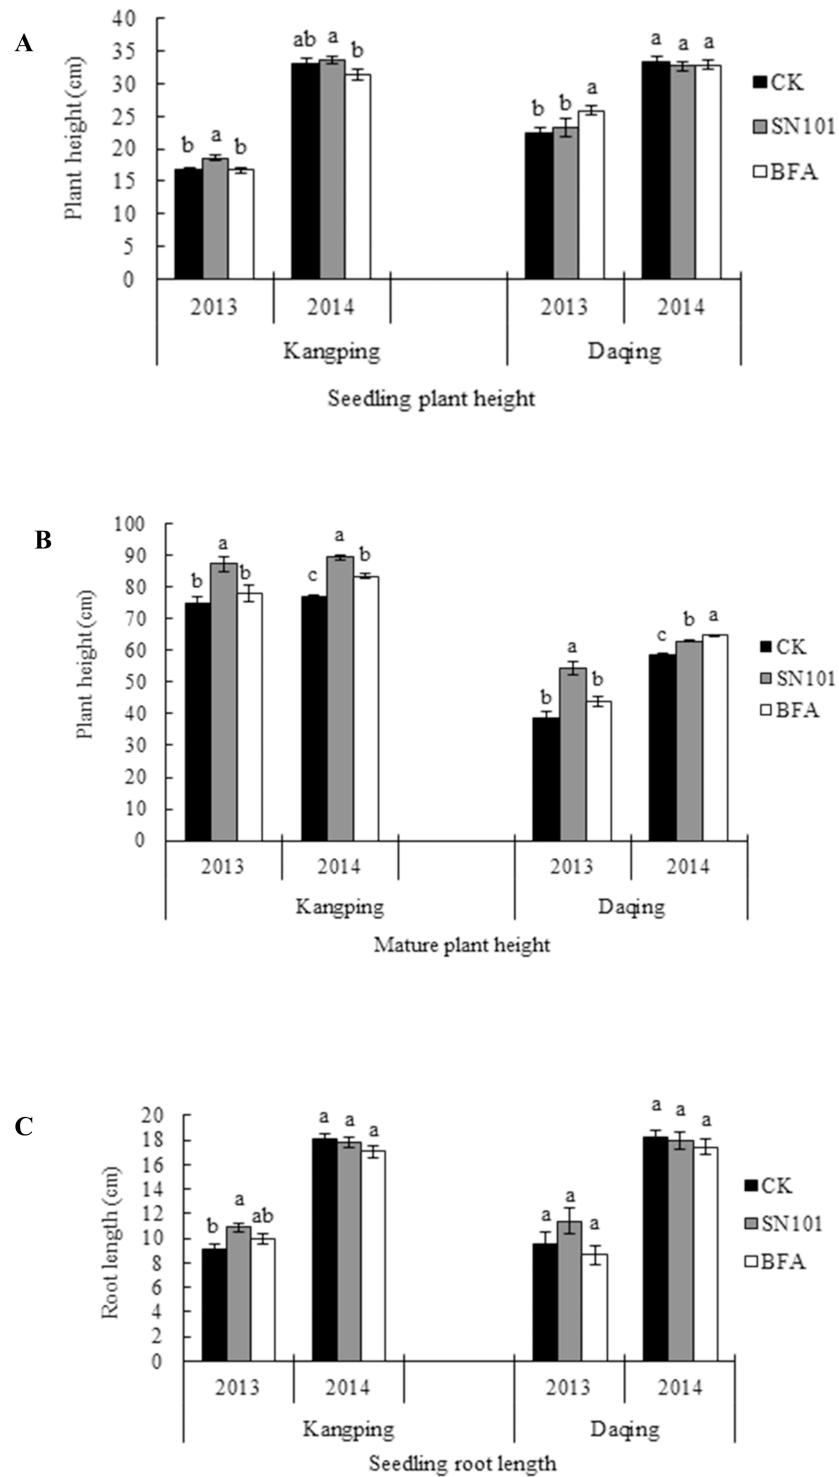

**Fig 4. Effects of SN101 seed coating on soybean height and root length under field conditions in 2013 and 2014.** Plants were treated with biocontrol seed coating-sn101, chemical seed coating-BFA and uncoated-CK. The seedling plant height, mature plant height and seedling root length was measured in seedling (after planted 30–35 days) and mature (about after planted 150 days). The data in the figure are mean ± SE and means on the same column followed by different letters indicate significant differences based on a LSD test ( $P \leq 0.05$ ,  $n = 125$ ). **A.** seedling plant height, **B.** mature plant height, **C.** seedling root length.

<https://doi.org/10.1371/journal.pone.0182654.g004>

**Table 4. Effect of SN101 on soybean yields under field conditions in Kangping and Daqing in 2013 and 2014 ( $P \leq 0.05$ ).**

|      |       | Kangping              |                        |                     |                         | Daqing                |                        |                     |                         |
|------|-------|-----------------------|------------------------|---------------------|-------------------------|-----------------------|------------------------|---------------------|-------------------------|
|      |       | Pods number per plant | Seeds number per plant | 100-seed weight (g) | Yield increase rate (%) | Pods number per plant | Seeds number per plant | 100-seed weight (g) | Yield increase rate (%) |
| 2013 | CK    | 47.2±2.97a            | 92.48±6.1a             | 22.06±.68a          | —                       | 22.96±1.43c           | 61.2±4.1c              | 14.62±.31a          | —                       |
|      | SN101 | 51.96±2.40a           | 103.52±5.25a           | 23.09±.63a          | 30.44                   | 40.72±1.4a            | 89.08±4.93a            | 16.22±.76a          | 65.04                   |
|      | BFA   | 52.92±2.995a          | 94.96±6.3528a          | 23.9±.51a           | 5.19                    | 30.24±1.97b           | 69.52±5.83b            | 14.94±.66a          | 20.2                    |
| 2014 | CK    | 31.24±.64c            | 54.67±1.15c            | 28.97±.29a          | —                       | 34.52±.79b            | 86.78±2.45b            | 18.4±.51a           | —                       |
|      | SN101 | 37.68±.69a            | 66.72±.94a             | 29.48±.65a          | 29.75                   | 37.712±.62a           | 100.57±1.87a           | 19.44±.52a          | 37.12                   |
|      | BFA   | 34.06±.69b            | 62.92±1.29b            | 29.12±.43a          | 17.11                   | 36.8±.71a             | 97.33±2.18a            | 19.09±.37a          | 29.06                   |

<https://doi.org/10.1371/journal.pone.0182654.t004>

**Table 5. Effect of SN101 on final yields of soybeans under field conditions in Heihe from 2012 to 2015 and in Jiusan from 2012 to 2016.**

| Year | Final yields in Heihe Station (Kg/ha) |       | Final yields in Jiusan Station (Kg/ha) |       |
|------|---------------------------------------|-------|----------------------------------------|-------|
|      | CK                                    | SN101 | CK                                     | SN101 |
| 2012 | 1773                                  | 2223  | 2010                                   | 2200  |
| 2013 | 1151                                  | 1266  | 2262                                   | 2475  |
| 2014 | 2140                                  | 2446  | 3000                                   | 3225  |
| 2015 | 1698                                  | 1961  | 3000                                   | 3499  |
| 2016 | 1247                                  | 1543  | 1395                                   | 1562  |

Plants were treated with biocontrol seed coating-SN101 and uncoated-CK.

<https://doi.org/10.1371/journal.pone.0182654.t005>

nematode control. Perhaps one of mechanisms is that co-application of various bacteria may augment overlay the generation of toxins, enzymes or metabolites from bacteria and plants.

In summary, application of soybean seed-coating with different biocontrol strains not only has lethal effects on nematodes but also enhances the yields of soybean plants. Such effect is better than commercial seed coating agent. The results obtained in this study are highly encouraging and suggests that seed treatment with SN101 may represent a safe economic and effective alternative way to use nematicides in commercial soybean cultivation.

## Supporting information

**S1 Table. Effect of the three strains on the number of cysts.** Plants were treated with *Bacillus simple* (Sneb545), *B. megaterium* (Sneb482) and *Sinarhizobium fredii* (Sneb183) under three field conditions in Daqing City of Heilongjiang Province, Anda County of Heilongjiang Province and Kangping County of Liaoning Province, respectively in 2011. The data in the table are mean ± SE and means on the same column followed by different letters indicate significant differences based on a LSD test ( $P \leq 0.05$ ,  $n = 125$ ).

(DOCX)

## Acknowledgments

This work was supported by the Special Fund for Agro-scientific Research in the Public Interest (201503114), National Natural Science Foundation of China (31471748), and China Agriculture Research System CARS-04-PS13. We also appreciate Shiyan Chen and Junbo Luan in Cornell University for comments and suggestions on the manuscript.

## Author Contributions

**Conceptualization:** Xiaofeng Zhu, Xiaoyu Liu, Yuxi Duan.

**Data curation:** Yuanyuan Zhou, Yuanyuan Wang, Xiaofeng Zhu.

**Formal analysis:** Yuanyuan Zhou, Rui Liu, Peng Xiang.

**Funding acquisition:** Yuxi Duan, Lijie Chen.

**Investigation:** Yuanyuan Zhou, Peng Xiang, Jingsheng Chen.

**Methodology:** Yuanyuan Zhou, Yuxi Duan.

**Project administration:** Yuxi Duan, Lijie Chen.

**Resources:** Yuxi Duan, Lijie Chen.

**Software:** Yuanyuan Zhou, Peng Xiang, Jingsheng Chen.

**Supervision:** Xiaoyu Liu.

**Validation:** Yuxi Duan, Lijie Chen.

**Visualization:** Yuanyuan Zhou, Yuanyuan Wang, Xiaofeng Zhu.

**Writing – original draft:** Yuanyuan Zhou.

**Writing – review & editing:** Yuxi Duan, Lijie Chen.

## References

1. Duan Y, Chen L, Liu G, Li H, Wang X, Wang Y, et al. Plant pathogenic nematodes. in: The Economic Importance of Plant Pathogenic Nematodes, Sinece Press, Beijing. 2011: 1–2.
2. Riggs RD, Wrather JA. Biology and management of the soybean cyst nematode; Noel GR, editor. American Phytopathological Society: St. Paul, MN. 1992.
3. Wrather JA, Stienstra WC, Koening SR. Soybean disease loss estimates for the United States from 1996 to 1998. Canadian Journal of Plant Pathology. 2001; 23: 122–131. <https://doi.org/10.1080/07060660109506919>
4. Wrather JA, Koening SR. Estimates of Disease Effects on Soybean Yields in the United States 2003 to 2005. Journal of nematology. 2006; 38: 173–180. PMID: PMC2586459 PMID: [19259444](https://pubmed.ncbi.nlm.nih.gov/19259444/)
5. Jones MGK. Host cell responses to endoparasitic nematode attacks: Structure and function of giant cells and syncytia. Annals of Applied Biology. 2008; 97: 353–372.
6. Hussaini SSS A. R. Interrelationship between *Meloidogyne incognita* and *Rhizobium* sp. on mung (*Phaseolus aureus*). Indian J Nematol. 1975; 5: 188–199.
7. Dai J, Xiong J. Study on Resistance to Soybean Cyst Nematode and its Breeding in China. Journal of Anhui Agri Sci. 2007; 35: 3183–3185.
8. Yu B, Duan Y, Wang J, Chen L. Selection of Virulent Phenotypes from an Original Race 3 Population of *Heterodera Glycines* by Resistant Cultivars. soybean science. 2009; 28: 491–494.
9. Cabrera JA, Kurtz A, Sikora R, Schouten A. Isolation and characterization of fenamiphos degrading bacteria. Biodegradation. 2010; 21: 1017–1027. <https://doi.org/10.1007/s10532-010-9362-z> PMID: [20464454](https://pubmed.ncbi.nlm.nih.gov/20464454/)
10. Keawkham T, Siri B, Hynes RK. Effect of polymer seed coating and seed dressing with pesticides on seed quality and storability of hybrid cucumber. Australian Journal of Crop Science. 2014; 8: 1415–1420. PMID: [1625562697](https://pubmed.ncbi.nlm.nih.gov/1625562697/)
11. El-Abyad M, El-Sayed M, El-Shanshoury A, El-Sabbagh SM. Towards the biological control of fungal and bacterial diseases of tomato using antagonistic *Streptomyces* spp. Plant and soil. 1993; 149: 185–195.
12. Zeng D, Luo X, Tu R. Application of Bioactive Coatings Based on Chitosan for Soybean Seed Protection. International Journal of Carbohydrate Chemistry. 2012; 2012: 5. <https://doi.org/10.1155/2012/104565>
13. Zeng D, Tu R, Wu S. Preparation and application of a novel environmentally friendly cucumber seed coating agent. Journal of Yeast and Fungal Research. 2011; 2: 7–12.

14. Becker J, Zavaleta-Mejia E, Colbert S, Schroth M, Weinhold A, & Hancoko J, et al. Effects of rhizobacteria on root-knot nematodes and gall formation. *Phytopathology*. 1988; 78: 1466–1469.
15. Siddiqui I, Shaikat S. Endophytic bacteria: prospects and opportunities for the biological control of plant-parasitic nematodes. *Nematologia Mediterranea*. 2003; 31: 111–120.
16. Terefe M, Tefera T, Sakhuja P. Effect of a formulation of *Bacillus firmus* on root-knot nematode *Meloidogyne incognita* infestation and the growth of tomato plants in the greenhouse and nursery. *Journal of invertebrate pathology*. 2009; 100: 94–99. <https://doi.org/10.1016/j.jip.2008.11.004> PMID: 19041655
17. Hallmann J, Quadt-Hallmann A, Miller W, Sikora R, Lindow S. Endophytic colonization of plants by the biocontrol agent *Rhizobium etli* G12 in relation to *Meloidogyne incognita* infection. *Phytopathology*. 2001; 91: 415–422. <https://doi.org/10.1094/PHYTO.2001.91.4.415> PMID: 18943855
18. Abbasi MW, Ahmed N, Zaki MJ, Shuakat SS, Khan D. Potential of *Bacillus* species against *Meloidogyne javanica* parasitizing eggplant (*Solanum melongena* L.) and induced biochemical changes. *Plant and soil*. 2014; 375: 159–173.
19. Anastasiadis I, Giannakou I, Prophetou-Athanasidou D, Gowen S. The combined effect of the application of a biocontrol agent *Paecilomyces lilacinus*, with various practices for the control of root-knot nematodes. *Crop Protection*. 2008; 27: 352–361.
20. Zhao Y, Duan Y, Wang Y, Chen L, YIN L. Stress resistance and biocontrol potential of soybean rhizobia resources isolated from Liaoning Province. *Soybean Sci*. 2009; 28: 114–117.
21. Sun H, Duan Y, Jiao S, Chen L, Wang Y. Filtration and Identification of Plant Growth Promoting Rhizobacteria on Resistance of Soybean Cyst Nematode [J]. *Soybean Science*. 2009; 28: 507–510.
22. Xiang P, Chen L, Zhu X, Wang Y, Duan Y. Screening and Identification of Bacterium to Induce Resistance of Soybean against *Heterodera glycines*. *Chinese Journal of Biological Control* 2013; 29: 661–666.
23. Riggs RD, Schmitt DP. Complete Characterization of the Race Scheme for *Heterodera glycines*. *Journal of Nematology*. 1988; 20: 392–395. PMID: 19290228
24. Hashem M, Abo-Elyousr KA. Management of the root-knot nematode *Meloidogyne incognita* on tomato with combinations of different biocontrol organisms. *Crop Protection*. 2011; 30: 285–292. <https://doi.org/https://doi.org/10.1016/j.cropro.2010.12.009>
25. Abdul-Baki AA, Anderson JD. Vigor determination in soybean seed by multiple criteria. *Crop science*. 1973; 13: 630–633.
26. Hussey RS, Barker KR. Comparison of methods of collecting inocula of *Meloidogyne* spp., including a new technique. *Plant Disease Reporter*. 1973; 57: 1025–1028.
27. Dababat A, Sikora RA. Importance of application time and inoculum density of *Fusarium oxysporum* 162 for biological control of *Meloidogyne incognita* on tomato. *Nematropica*. 2007; 37: 267–275.
28. Khan A, Williams KL, Nevalainen HKM. Control of plant-parasitic nematodes by *Paecilomyces lilacinus* and *Monacrosporium lysipagum* in pot trials. *BioControl*. 2006; 51: 643–658.
29. Tian B, Yang J, Zhang K. Bacteria used in the biological control of plant-parasitic nematodes: populations, mechanisms of action, and future prospects. *FEMS microbiology ecology*. 2007; 61: 197–213. <https://doi.org/10.1111/j.1574-6941.2007.00349.x> PMID: 17651135
